# Supplementary material for: The Subgingival Microbiome in Patients with Down Syndrome and Periodontitis
Source: MDPI journal article supplement (doi:10.3390/jcm9082482), 2020-08-02
Supplement: s1 [file s1]

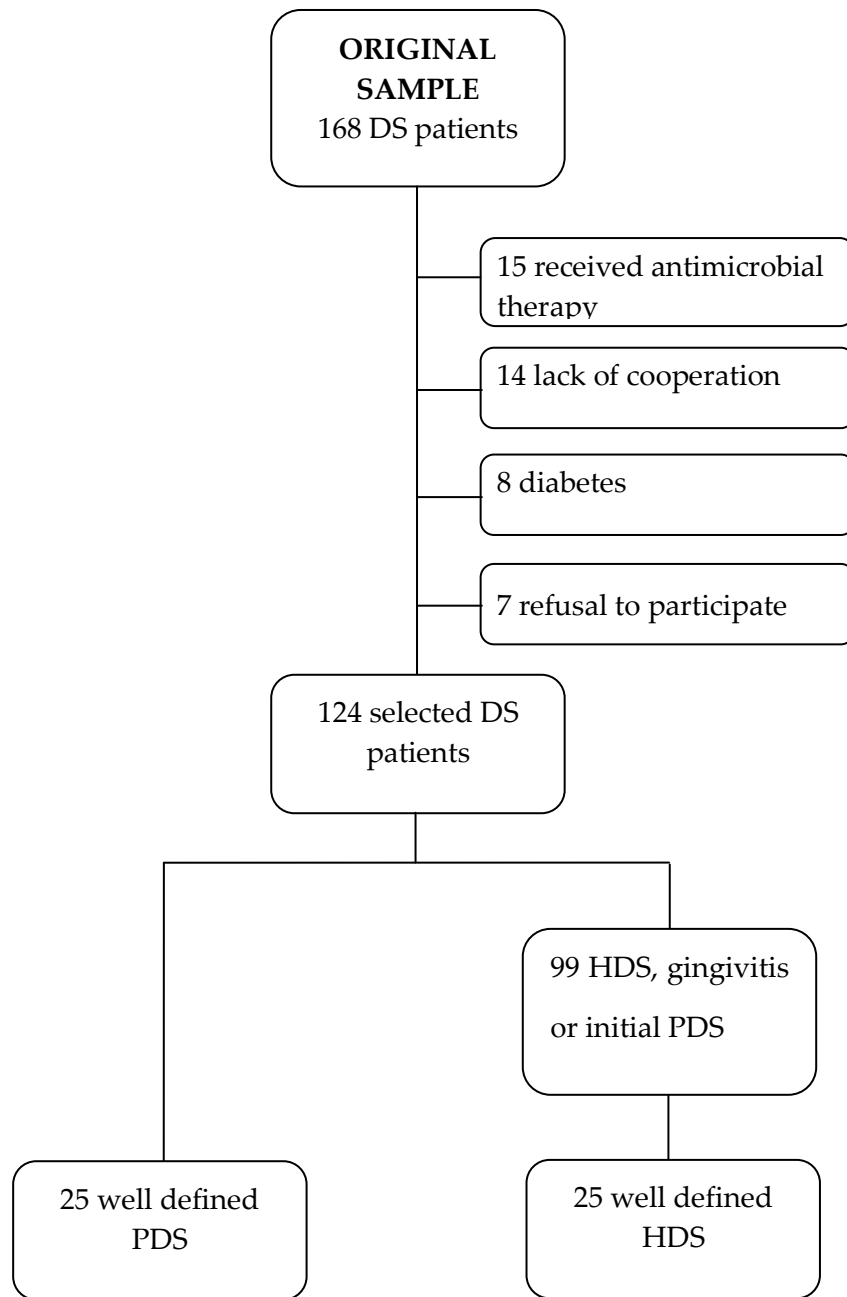

**Figure S1.** Flow diagram for the selection of individuals with Down syndrome included in this study with periodontitis (PDS) and healthy periodontium (HDS).
