# Supplementary figures and images for: The Subgingival Microbiome in Patients with Down Syndrome and Periodontitis
Source: MDPI journal article supplement (doi:10.3390/jcm9082482), 2020-08-02

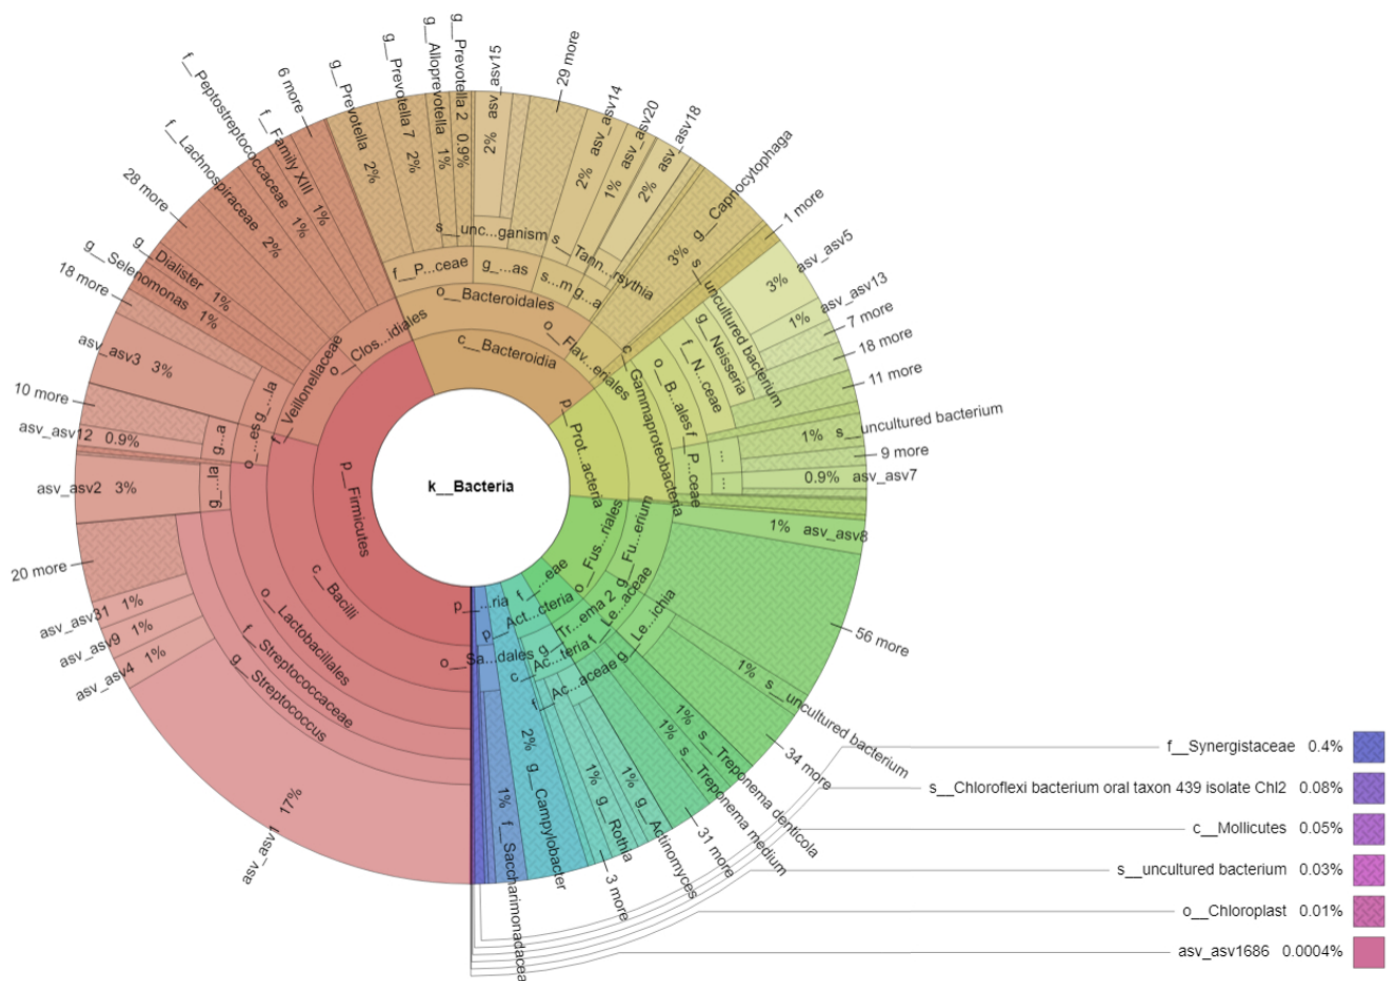

Supplement: s1 [file s1]

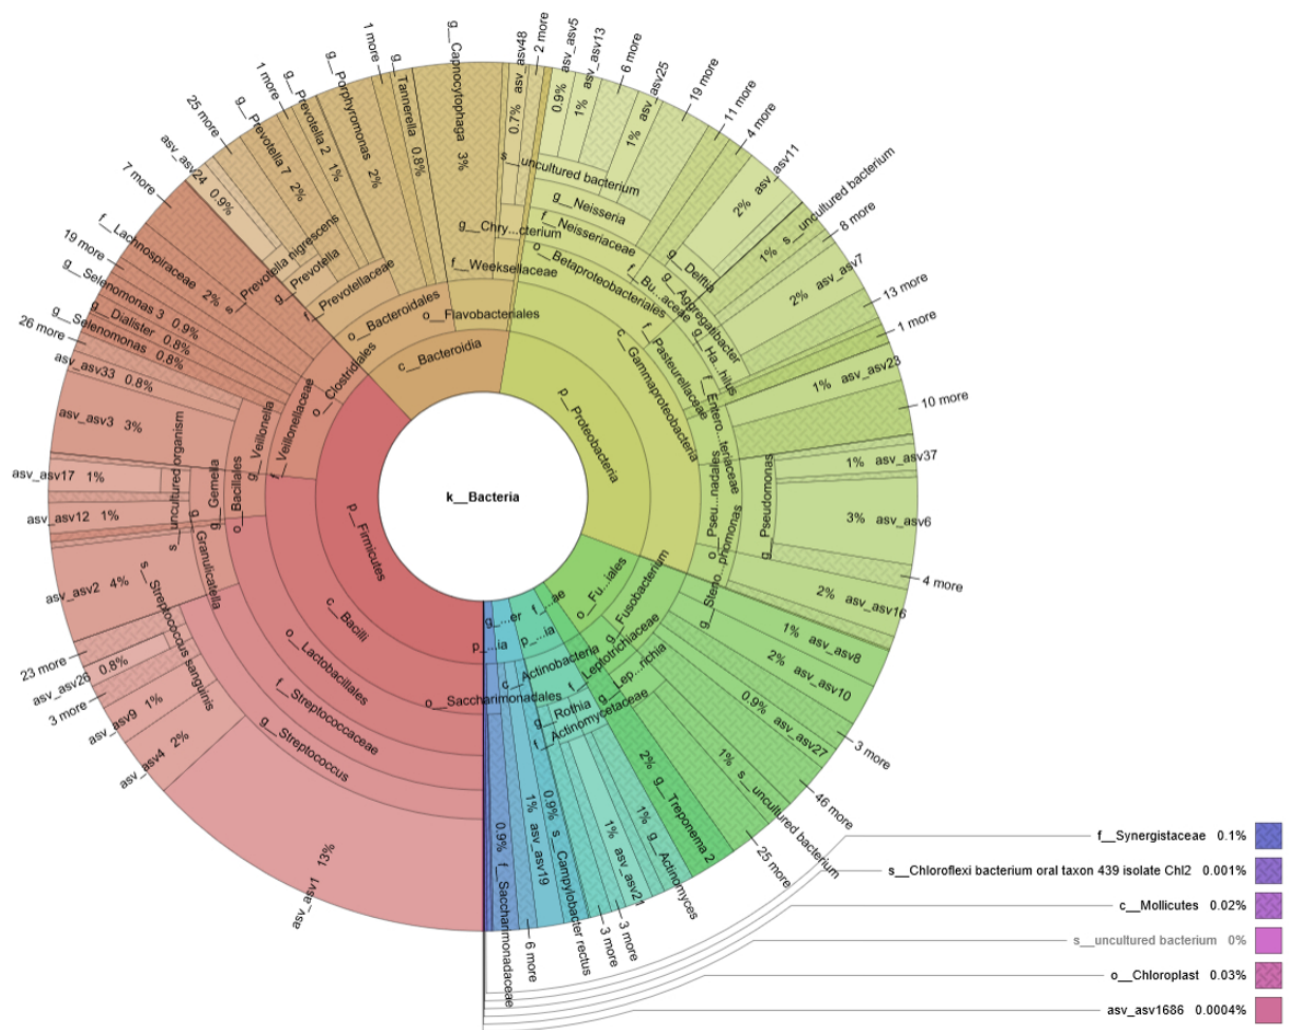

Supplement: s1 [file s1]
